# Supplementary material
Source: publisher figshare collection journal article supplement (https://frontiersin.figshare.com/ndownloader/files/22926119)
Supplement: Supplementary file 1 [file 22926119]

## Sheet: Table S1
Supplementary Table 1: Data for reference standards analyzed by electron microprobe.
All analyses are in weight percent. n: number of analyses; RSD: relative standard deviation.
		SiO2	TiO2	Al2O3	FeO	MnO	MgO	CaO	Na2O	K2O	NiO	Cr2O3	Nb2O3	Total
Augite Kakanuia	Mean (n=68)	50.2206	0.807888	8.33186	6.43215	0.156654	16.411	15.9608	1.32653	0.00452353	-	0.155812	-	99.8099
	Std.dev.	0.506426	0.0387545	0.186803	0.153624	0.0324793	0.177169	0.162441	0.0871666	0.00533465	-	0.0160498	-	0.633582
	RSD %	1.0084	4.79702	2.24203	2.38838	20.7331	1.07958	1.01776	6.57102	117.931	-	10.3007	-	0.634789
	Reference	50.73	0.74	8.73	6.34178	0.13	16.65	15.82	1.27	0	-	-	-	100.41
Cr-Augiteb	Mean (n=51)	50.5296	0.475355	7.62433	4.82853	0.139951	17.3728	17.4933	0.8469	0.00703725	-	0.890824	-	100.196
	Std.dev.	0.700991	0.0236311	0.166714	0.128042	0.0238268	0.178998	0.145157	0.0408303	0.0067186	-	0.0251217	-	0.792356
	RSD %	1.38729	4.97125	2.18661	2.65178	17.0251	1.03034	0.829786	4.82115	95.4719	-	2.82005	-	0.790809
	Reference	50.48	0.51	8.03	4.71	0.12	17.32	17.3	0.84	0.01	-	0.85	-	100.17
Ol San Carlosa	Mean (n=7)	40.6159	-	-	9.74936	0.154514	49.2206	0.0875429	-	-	0.326171	<0.05	-	100.234
	Std.dev.	0.132099	-	-	0.0516885	0.00878359	0.233153	0.00672579	-	-	0.136907	0.142605	-	0.376128
	RSD %	0.325239	-	-	0.530173	5.68464	0.473689	7.68285	-	-	41.9739	199.607	-	0.37525
	Reference	40.81	-	-	9.55	0.14	49.42	0.05	-	-	0.37	-	-	100.34
Ilmenitea	Mean (n=2)	<0.07	46.1548	<0.05	46.9996	4.64645	0.30675	0.007	-	-	<0.12	<0.05	0.93745	99.227
	Reference	-	45.7	-	46.54	4.77	0.31	-	-	-	-	-	0.92	98.24
Chromitea	Mean (n=2)	0.14015	0.12095	10.2795	13.2359	0.2079	14.8754	0.0119	-	-	0.1686	59.9087	-	99.0215
	Reference	-	-	9.92	13.04	0.11	15.2	-	-	-	-	60.5	-	98.77
Sources for reference values:
a) Jarosewich, E.J., Nelen, J.A. and Norberg, J.A., 1980. Geostandards Newsletter, 4: 43-47, Correction Vol. 4, 257-258.
b) Jarosewich, E.J., Gooley, R., and Husler, J., 1987. Geostandards Newsletter, 11: 197-198.
